# Supplementary material
Source: publisher site journal article supplement (https://www.dovepress.com/article/360691)
Supplement: Supplementary file 1 [file get_supplementary_file.php]

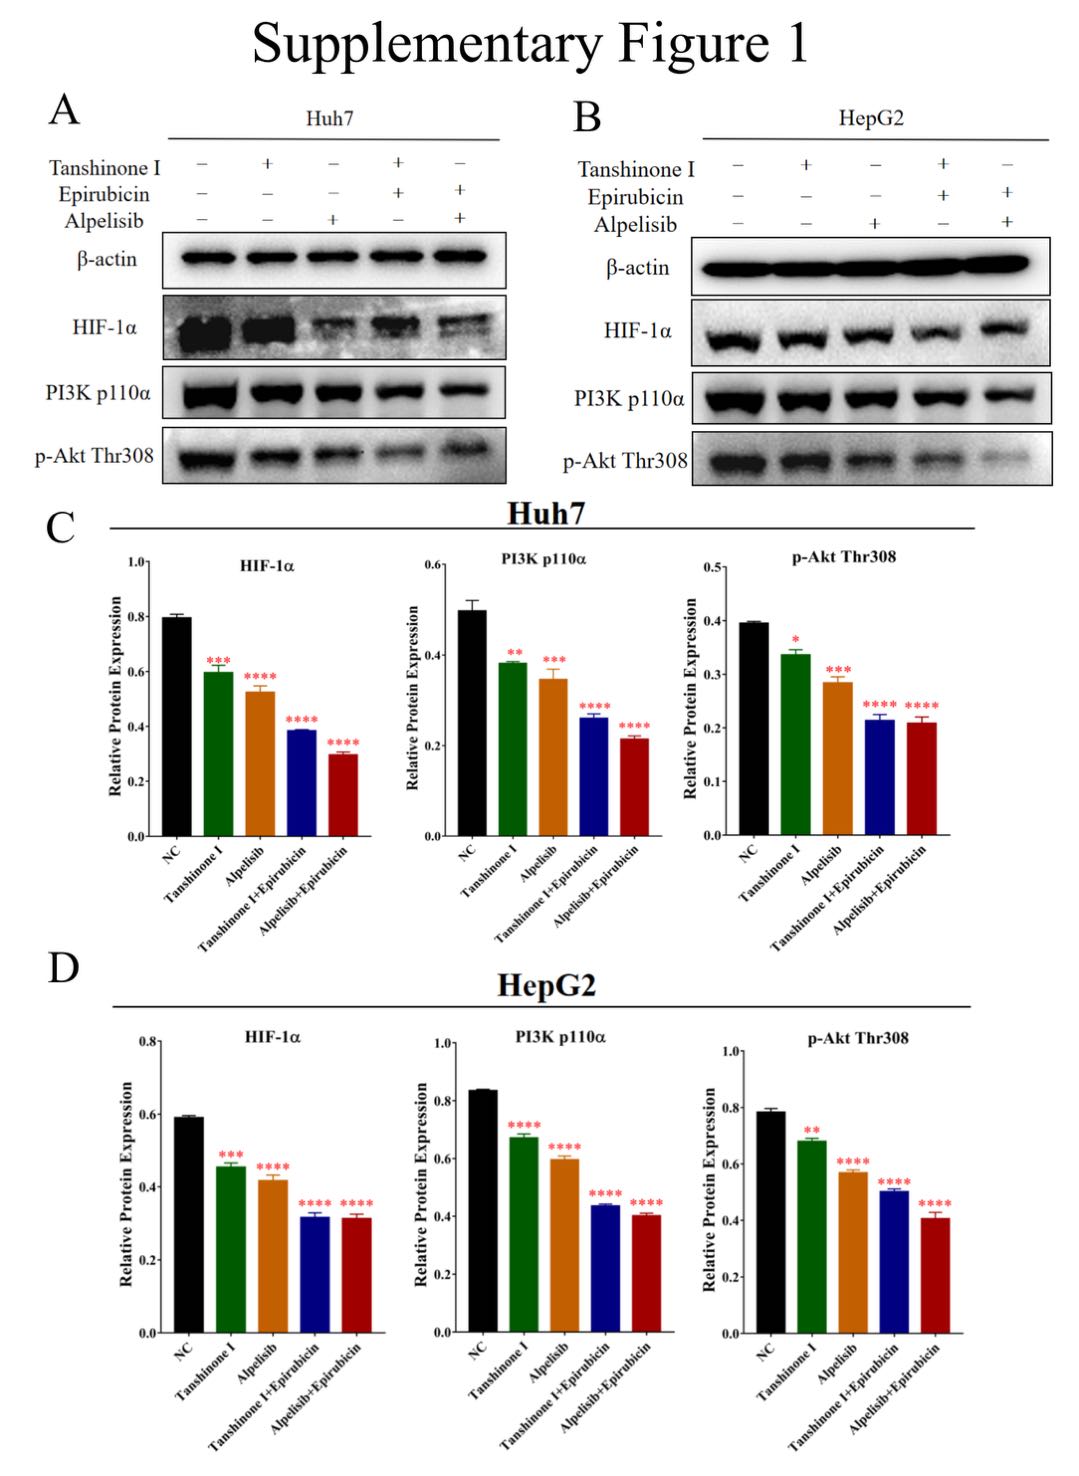


**Supplementary Figure 1 Legend**

**Supplementary Figure 1:** Both of Tan I and the PI3K inhibitor (alpelisib) could inhibit the expression levels of PI3K-p110α, p-Akt-Thr308, and HIF-1α. The combined treatment of Tan I and EADM or the combined treatment of alpelisib and EADM could enhance the inhibition of PI3K/AKT/HIF-1α signaling. (**A, B**) Western blotting was performed to detect the expression levels of PI3K p110α, p-Akt Thr308 and HIF-1α in Huh7 and HepG2 treated with Tan I, EADM, alpelisib, and the combination treatment, compared with the group without treatment. (**C, D**) The relative expressions of PI3K p110α, p-Akt Thr308, and HIF-1α in Huh7 and HepG2 were quantified via normalization to β-actin. The data presented mean +/- SEM. **p* < 0.01; ***p* < 0.001; ****p* < 0.0001; *****p* < 0.00001; n.s, no statistical significance. All data were repeated three times.
